# Supplementary material for: Facial recognition technology can expose political orientation from naturalistic facial images
Source: PubMed Central journal article supplement (PMC7801376; doi:10.1038/s41598-020-79310-1), 2021-01-11
Supplement: 41598_2020_79310_MOESM1_ESM.pdf [file 41598_2020_79310_MOESM1_ESM.pdf]

### Supplementary Information for

## Facial recognition technology can expose political orientation from naturalistic facial images

Michal Kosinski (michalk@stanford.edu)

Supplementary Table S1. Accuracy afforded by facial features when predicting political orientation. All 95% confidence intervals are below 1% and are thus omitted.

|                      |                          | Dating Website |        |     |          |
|----------------------|--------------------------|----------------|--------|-----|----------|
|                      |                          | U.S.           | Canada | UK  | Facebook |
| Head pose            | Yaw (absolute)           | 54%            | 53%    | 54% | 51%      |
|                      | Pitch                    | 56%            | 57%    | 54% | 51%      |
|                      | Roll (absolute)          | 53%            | 53%    | 52% | 52%      |
|                      | Combined                 | 58%            | 58%    | 57% | 53%      |
| Emotional expression | Neutral                  | 53%            | 54%    | 51% | 53%      |
|                      | Sadness                  | 50%            | 52%    | 50% | 53%      |
|                      | Disgust                  | 51%            | 53%    | 50% | 53%      |
|                      | Anger                    | 51%            | 52%    | 50% | 54%      |
|                      | Surprise                 | 52%            | 50%    | 52% | 55%      |
|                      | Fear                     | 51%            | 52%    | 50% | 54%      |
|                      | Happiness                | 50%            | 54%    | 51% | 56%      |
| Combined             | 54%                      | 56%            | 53%    | 57% |          |
| Other                | Facial hair (males only) | 51%            | 54%    | 62% | 51%      |
|                      | Glasses                  | 50%            | 51%    | 51% | 51%      |
|                      | Sunglasses               | 51%            | 51%    | 52% | 52%      |
| All facial cues      |                          | 59%            | 60%    | 59% | 59%      |

Supplementary Table S2. Intraclass correlation (ICC) between Face++ and two raters' estimates of head pose and emotional expressions based on a subset of 300 images from the Facebook sample. Two-way random, single-score (A,1) and two-way mixed, average-score (C,k) coefficients are reported.

|                      | Facial Feature | ICC(A,1) | ICC(C,k) |
|----------------------|----------------|----------|----------|
| Head pose            | Yaw            | .55      | .71      |
|                      | Pitch          | .29      | .45      |
|                      | Roll           | .14*     | .25*     |
| Emotional expression | Neutral        | .82      | .90      |
|                      | Sadness        | .28      | .44      |
|                      | Disgust        | .51      | .67      |
|                      | Anger          | .72      | .83      |
|                      | Surprise       | .75      | .86      |
|                      | Fear           | .52      | .68      |
|                      | Happiness      | .86      | .92      |

*Note.* The asterisks \* indicate the p-value of <.01; other p-values are at the <.001 level.
